# Supplementary material for: A novel MXI1-NUTM2B fusion detected in an undifferentiated ovarian cancer
Source: PubMed Central journal article supplement — Gynecol Oncol Rep. 2024 Dec 6;57:101653. doi: 10.1016/j.gore.2024.101653 (PMC11699607; doi:10.1016/j.gore.2024.101653), 2024-12-06

## CONSENT FORM FOR CASE REPORTS

**For a patient's consent to publication of information about them in a journal or thesis**

Name of person described in article or shown in photograph: \_\_\_\_\_

Subject matter of photograph or article: \_\_\_\_\_

Title of article: A Novel MXI1-NUTM2B Fusion Detected In An Undifferentiated Ovarian Cancer

Medical practitioner or corresponding author: Mohammed Elshafey

I Jamie Smith give my consent for this information about MYSELF, relating to the subject matter above to appear in a journal article, or to be used for the purpose of a thesis or presentation.

I understand the following:

1. The Information will be published without my name attached and every attempt will be made to ensure anonymity. I understand, however, that complete anonymity cannot be guaranteed. It is possible that somebody somewhere - perhaps, for example, somebody who looked after me, if I was in hospital, or a relative - may identify me.
2. The Information may be published in a journal which is read worldwide or an online journal. Journals are aimed mainly at health care professionals but may be seen by many non-doctors, including journalists.
3. The Information may be placed on a website.
4. I can withdraw my consent at any time before online publication, but once the Information has been committed to publication it will not be possible to withdraw the consent.

Signed: Jamie Smith Date: 7/3/24

Signature of requesting medical practitioner/health care worker:

[Signature] Date: 7/3/24

FIN: 860027382461 PTID: 41249753  
SMITH, JAMIE R  
BD: 05/16/1980 F MRN: XXXX6913  
PCP: GANDHE, NALINIK DOS: 07/03/24 08:05  
ATTN: GOGOI MD, RADHI GYNKKC

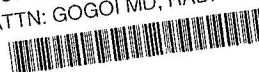

Supplement: mmc1.pdf [file mmc1.pdf]
